# Supplementary material for: Mindfulness and Athlete Burnout: A Systematic Review and Meta-Analysis
Source: PubMed Central journal article supplement (PMC6388258; doi:10.3390/ijerph16030449), 2019-02-03
Supplement: ijerph-16-00449-s001.pdf [file ijerph-16-00449-s001.pdf]

Review

# Mindfulness and Athlete Burnout: A Systematic Review and Meta-Analysis

Chunxiao Li, Yuxin Zhu, Mengge Zhang, Henrik Gustafsson and Tao Chen

Table S1. Trials.

| Study # | First author (year) | Q1 | Q2 | Q3 | Q4 | Q5 | Q6 | Q7 | Q8 | Q9 | Q10 | Q11 | Q12 | Q13 | Q14 | Q15 | Q16 | Q17 | Q18 | Q19 | Q20 | Q21 | Q22 | Q23 | Q24 | Q25 | Q26 | Q27 | Total (%) | Quality |
|---------|---------------------|----|----|----|----|----|----|----|----|----|-----|-----|-----|-----|-----|-----|-----|-----|-----|-----|-----|-----|-----|-----|-----|-----|-----|-----|-----------|---------|
| 1       | Moen (2016)         | 1  | 0  | 0  | 1  | 0  | 1  | 0  | 0  | 0  | 1   | 0   | 0   | 1   | 0   | 0   | 0   | 0   | 1   | 0   | 1   | 1   | 1   | 0   | 0   | 0   | 0   | 0   | 9 (32%)   | Weak    |
| 2       | Moen (2015)         | 1  | 0  | 0  | 1  | 0  | 1  | 0  | 0  | 0  | 1   | 0   | 0   | 1   | 0   | 0   | 0   | 0   | 1   | 0   | 1   | 1   | 1   | 0   | 0   | 0   | 0   | 0   | 9 (32%)   | Weak    |

Note. 1 = Yes, 0 = No/Unable to determine (except Q5: 2 = Yes, 1 = Partially, 0 = No)

Q1: Is the hypothesis/aim/objective of the study clearly described?

Q2: Are the main outcomes to be measured clearly described in the Introduction or Methods section?

Q3: Are the characteristics of the patients included in the study clearly described?

Q4: Are the interventions of interest clearly described?

Q5: Are the distributions of principal confounders in each group of subjects to be compared clearly described?

Q6: Are the main findings of the study clearly described?

Q7: Does the study provide estimates of the random variability in the data for the main outcomes?

Q8: Have all important adverse events that may be a consequence of the intervention been reported?

Q9: Have the characteristics of patients lost to follow-up been described?

Q10: Have actual probability values been reported (e.g. 0.035 rather than <0.05) for the main outcomes except where the probability value is less than 0.001?

Q11: Were the subjects asked to participate in the study representative of the entire population from which they were recruited?

- Q12: Were those subjects who were prepared to participate representative of the entire population from which they were recruited?
- Q13: Were the staff, places, and facilities where the patients were treated, representative of the treatment the majority of patients receive?
- Q14: Was an attempt made to blind study subjects to the intervention they have received?
- Q15: Was an attempt made to blind those measuring the main outcomes of the intervention?
- Q16: If any of the results of the study were based on “data dredging”, was this made clear?
- Q17: In trials and cohort studies, do the analyses adjust for different lengths of follow-up of patients, or in case-control studies, is the time period between the intervention and outcome the same for cases and controls?
- Q18: Were the statistical tests used to assess the main outcomes appropriate?
- Q19: Was compliance with the intervention/s reliable?
- Q20: Were the main outcome measures used accurate (valid and reliable)?
- Q21: Were the patients in divergent intervention groups (trials and cohort studies) or were the cases and controls (case-control studies) recruited from the same population?
- Q22: Were study subjects in divergent intervention groups (trials and cohort studies) or were the cases and controls (case-control studies) recruited over the same period of time?
- Q23: Were study subjects randomized to intervention groups?
- Q24: Was the randomized intervention assignment concealed from both patients and health care staff until recruitment was complete and irrevocable?
- Q25: Was there adequate adjustment for confounding in the analyses from which the main findings were drawn?
- Q26: Were losses of patients to follow-up taken into account?
- Q27: Did the study have sufficient power to detect a clinically important effect where the probability value for a difference being due to chance is less than 5%?

Table S2. Survey.

| Study # | First author (year) | Q1 | Q2 | Q3 | Q4 | Q5 | Q6 | Q7 | Q8 | Q9 | Q10 | Total | Quality  |
|---------|---------------------|----|----|----|----|----|----|----|----|----|-----|-------|----------|
| 3       | Gusstafsson (2015)  | 1  | 1  | 0  | 1  | 1  | 1  | 1  | 1  | 1  | 1   | 9     | High     |
| 4       | Zhang (2016)        | 1  | 1  | 0  | 1  | 1  | 1  | 1  | 1  | 1  | 1   | 9     | High     |
| 5       | Walker (2013)       | 1  | 1  | 0  | 1  | 1  | 1  | 1  | 1  | 1  | 1   | 9     | High     |
| 6       | Moen (2015)         | 1  | 1  | 0  | 1  | 1  | 1  | 1  | 1  | 0  | 0   | 7     | Moderate |

|   |                |   |   |   |   |   |   |   |   |   |   |   |      |
|---|----------------|---|---|---|---|---|---|---|---|---|---|---|------|
| 7 | Zhang (2017)   | 1 | 1 | 0 | 1 | 1 | 1 | 1 | 1 | 1 | 1 | 9 | High |
| 8 | Amemiya (2019) | 0 | 1 | 0 | 1 | 1 | 1 | 1 | 1 | 1 | 1 | 8 | High |

Note. 1 = Yes, 0 = No

Q1: Were the aims/objectives of the study clear?

Q2: Was the study design appropriate for the stated aim(s)?

Q3: Was the sample size justified?

Q4: Was the target/reference population clearly defined? (Is it clear who the research was about?)

Q5: Were the risk factor and outcome variables measured correctly using instruments/measurements that had been trialled, piloted or published previously?

Q6: Were the methods (including statistical methods) sufficiently described to enable them to be repeated?

Q7: Were the results presented for all the analyses described in the methods?

Q8: Were the authors' discussions and conclusions justified by the results?

Q9: Were the limitations of the study discussed?

Q10: Was ethical approval or consent of participants attained?

**Table S3.** Qualitative Research.

| Study # | First author (year) | Q1 | Q2 | Q3 | Q4 | Q5 | Q6 | Q7 | Q8 | Q9 | Q10 | Total (%) | Quality  |
|---------|---------------------|----|----|----|----|----|----|----|----|----|-----|-----------|----------|
| 9       | Furrer (2015)       | 1  | 1  | 1  | 1  | 1  | 0  | 0  | 1  | 0  | 1   | 7 (70%)   | Moderate |
| 10      | Jouper (2013)       | 1  | 1  | 1  | 1  | 1  | 0  | 0  | 1  | 1  | 1   | 8 (80%)   | High     |

Note. 1 = Yes, 0 = No/Unclear/Not applicable

Q1: Is there congruity between the stated philosophical perspective and the research methodology?

Q2: Is there congruity between the research methodology and the research question or objectives?

Q3: Is there congruity between the research methodology and the methods used to collect data?

Q4: Is there congruity between the research methodology and the representation and analysis of data?

Q5: Is there congruence between the research methodology and the interpretation of results?

Q6: Is there a statement locating the researcher culturally or theoretically?

Q7: Is the influence of the researcher on the research, and vice-versa, addressed?

Q8: Are participants, and their voices, adequately represented?

Q9: Is the research ethical according to current criteria or, for recent studies, and is there evidence of ethical approval by an appropriate body?

Q10: Do the conclusions drawn in the research report flow from the analysis, or interpretation, of the data?

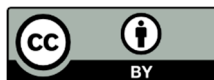

© 2019 by the authors. Submitted for possible open access publication under the terms and conditions of the Creative Commons Attribution (CC BY) license (<http://creativecommons.org/licenses/by/4.0/>).
